# Supplementary material for: Spontaneous Posterior Segment Vascular Disease Phenotype of a Mouse Model, rnv3, Is Dependent on the Crb1rd8 Allele
Source: PubMed Central journal article supplement — Invest Ophthalmol Vis Sci. 2018 Oct;59(12):5127–39. doi: 10.1167/iovs.18-25046 (PMC6203173; doi:10.1167/iovs.18-25046), 2018-10
Supplement: iovs-59-12-20_s01.pdf [file iovs-59-12-20_s01.pdf]

**SUPPLEMENTARY FIGURES**

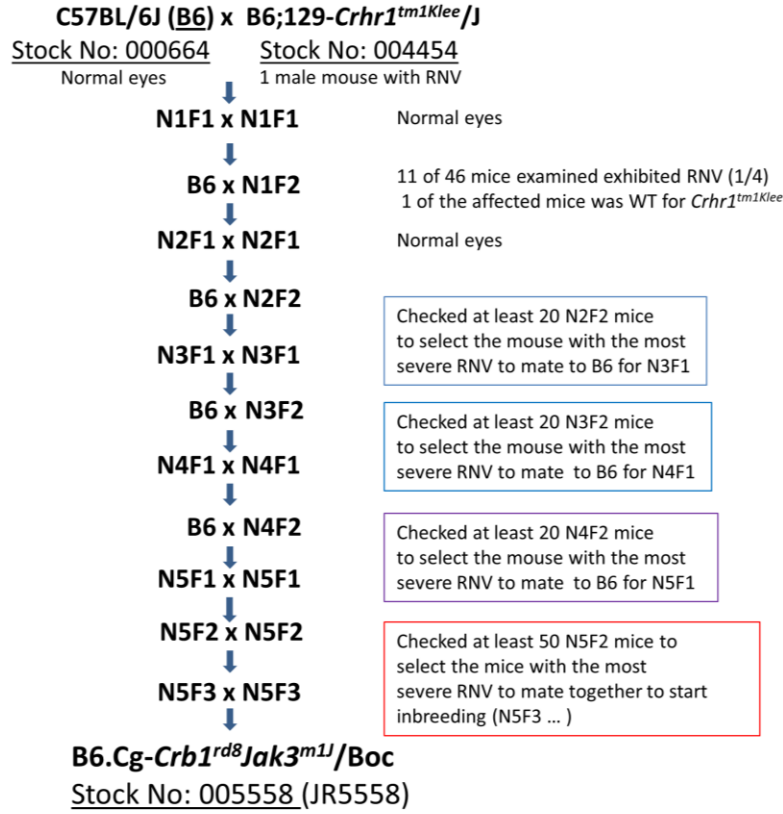

**Figure 1.** JR5558 breeding chart. The current generation number is N5F35.

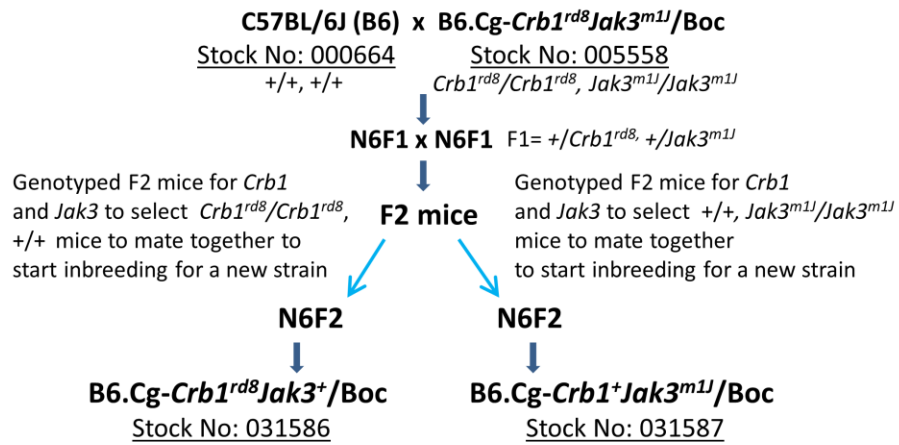

**Figure 2.** Breeding chart to segregate two mutant genes from JR5558. The current generation number for *Crb1* mutant line is N6 F15 and for *Jak3* mutant line is N6F14.
